# Supplementary material for: Changes in Response Inhibition, Visual Anticipation and Verbal Fluency During Vagus Nerve Stimulation Therapy in Patients With Drug‐Resistant Epilepsy
Source: PubMed Central journal article supplement (PMC11624008; doi:10.1002/brb3.70176), 2024-12-06
Supplement: BRB3-14-e70176-s001.pdf [file BRB3-14-e70176-s001.pdf]

**Supplementary Table 1.** Individual changes on ASMs, seizure frequency and test scores during follow-up period in patients with normal performance in EpiTrack at baseline.

| Sex / Age at baseline | Epilepsy type | Psych.com. | ASMs at baseline           | ASMs at final observation point | Predominant seizure type | Monthly seizure frequency 12 months prior baseline | Change in predominant seizure type compared to baseline | Duration of stimulation (months) | EpiTrack change | Change in maze seconds (subtest score) | Change in Interference seconds (subtest score) | Change in Verbal fluency words (subtest score) |
|-----------------------|---------------|------------|----------------------------|---------------------------------|--------------------------|----------------------------------------------------|---------------------------------------------------------|----------------------------------|-----------------|----------------------------------------|------------------------------------------------|------------------------------------------------|
| M / 53                | Other         | No         | LCM 400, LEV 2000          | LCM 400, LEV 2000               | FIAS                     | 10                                                 | ↓ < 25%                                                 | 13                               | 38 → 40         | 14 → 15 (7 → 7)                        | 20 → 19 (5 → 5)                                | 14 → 14 (4 → 4)                                |
| F / 44                | TLE           | No         | BRV 200, LCM 400           | BRV 200, LCM 400                | FAS                      | 54                                                 | ↓ < 25%                                                 | 24                               | 36 → 37         | 27 → 20 (6 → 6)                        | 18 → 17 (6 → 6)                                | 14 → 19 (4 → 4)                                |
| F / 33                | FLE           | No         | LTG 500, TPM 400           | LTG 500, TPM 50↓                | FIAS                     | 0.3                                                | ↓ 100 %                                                 | 14                               | 34 → 36         | 25 → 12 (6 → 7)                        | 13 → 11 (7 → 7)                                | 18 → 19 (4 → 4)                                |
| M / 22                | TLE           | No         | BRV 200, ESL 1600          | BRV 200, ESL 1600               | FIAS                     | 12                                                 | ↓ 100 %                                                 | 26                               | 33 → 35         | 16 → 15 (7 → 7)                        | 16 → 17 (6 → 6)                                | 9 → 9 (3 → 3)                                  |
| M / 32                | FLE           | No         | LEV 2000, ESL 2000         | BRV 200, ESL 2000               | FIAS                     | 3                                                  | ↓ ≥ 75% < 90%                                           | 29                               | 32 → 37         | 19 → 11 (6 → 7)                        | 15 → 12 (6 → 7)                                | 13 → 14 (3 → 4)                                |
| F / 32                | FLE           | No         | LEV 3000, LCM 600          | LEV 3000, LCM 600, CLB 5 +      | FBTCS                    | 0.3                                                | No change                                               | 29                               | 32 → 33         | 18 → 16 (6 → 7)                        | 23 → 16 (5 → 6)                                | 14 → 12 (4 → 3)                                |
| F / 26                | Other         | No         | LEV 3000, LCM 500          | LEV 3000, LCM 500               | FIAS                     | 0.5                                                | No change                                               | 32                               | 32 → 33         | 21 → 20 (6 → 6)                        | 14 → 16 (6 → 6)                                | 13 → 11 (3 → 3)                                |
| F / 31                | TLE           | YES / past | LCM 400, CLB 50            | LCM 400, CLB 35↓, BRV 150 +     | FIAS                     | 8                                                  | ↓ ≥ 25 < 50%                                            | 48                               | 32 → 32         | 20 → 24 (6 → 6)                        | 20 → 19 (5 → 5)                                | 8 → 10 (3 → 3)                                 |
| F / 24                | TLE           | No         | LTG 500, LEV 1750, ZNS 200 | LTG 500, LEV 1000↓, ZNS%        | FIAS                     | 1                                                  | ↑ 100 %                                                 | 33                               | 33 → 32         | 30 → 18 (6 → 6)                        | 18 → 14 (6 → 6)                                | 9 → 13 (3 → 3)                                 |
| M / 29                | FLE           | No         | OXC 2100, ZNS 500, CLB 20  | OXC 2100, ZNS 50↓, CLB 20       | SF                       | SF                                                 | No change                                               | 29                               | 33 → 33         | 23 → 18 (6 → 6)                        | 13 → 15 (7 → 6)                                | 9 → 9 (3 → 3)                                  |
| M / 29                | FLE           | No         | LCM 600, PER 8, CLB 20     | LCM 600, PER 8, CLB 20          | FBTCS                    | 0,3                                                | ↓ 100%                                                  | 12                               | 32 → 33         | 20 → 21 (6 → 6)                        | 18 → 16 (6 → 6)                                | 10 → 15 (3 → 4)                                |
| F / 22                | Other         | No         | ESL 1600, CLB 15, BRV 200  | ESL 1600, CLB 15, BRV 200       | FIAS                     | 6                                                  | ↓ ≥ 25 < 50%                                            | 12                               | 34 → 33         | 17 → 17 (7 → 7)                        | 16 → 18 (6 → 6)                                | 16 → 13 (4 → 3)                                |

Abbreviations: ↓ = decrease/reduction, ↑ = increase, + = add on, % = withdrawn, ASM = antiseizure medication, BRE = brivaracetam, CLB = clobazam, ESL = eslicarbazepine acetate, LCM = lacosamide, LEV = levetiracetam, LTG = lamotrigine, OXC = oxcarbamazepine, PER = perampanel, TLE = temporal lobe epilepsy, TPM = topiramate, ZNS = zonisamide, FAS = focal aware seizure, FBTCS = focal to bilateral tonic clonic seizure, FIAS = focal impaired awareness seizure, FLE = frontal lobe epilepsy, TLE = temporal lobe epilepsy. The green boxes in the 'ASMs at final observation point' column highlights ASM decrease/reduction, while the red boxes indicate ASM increase. In the 'Change in predominant seizure type compared to baseline' column, green highlights more than 50% seizure reduction, and red indicates more than 50% seizure increase. In the 'EpiTrack change' column and in the subsequent columns, green highlights patients with clinically significant improvement.

**Supplementary Table 2.** Individual changes on ASMs, seizure frequency and test scores during follow-up period in patients with mildly impaired performance in EpiTrack at baseline.

| Sex / Age at baseline | Epilepsy type | Psych.com.    | ASMs at baseline           | ASMs at final observation point | Predominant seizure type | Monthly seizure frequency 12 months prior baseline | Change in predominant seizure type compared to baseline | Duration of stimulation (months) | EpiTrack change | Change in maze seconds (subtest score) | Change in Interference seconds (subtest score) | Change in Verbal fluency words (subtest score) |
|-----------------------|---------------|---------------|----------------------------|---------------------------------|--------------------------|----------------------------------------------------|---------------------------------------------------------|----------------------------------|-----------------|----------------------------------------|------------------------------------------------|------------------------------------------------|
| M / 39                | FLE           | Yes / past    | LCM 350, CBZ 1100          | LCM 400↑, CBZ 1100              | FIAS                     | 7                                                  | ↓ ≥ 50% < 75%                                           | 20                               | 30 -> 34        | 33 → 23 (5 → 6)                        | 20 → 18 (5 → 6)                                | 13 → 15 (3 → 4)                                |
| F / 32                | TLE           | Yes/ current  | LTG 400, TPM 450           | LTG 400, TPM 325↓               | FBTCS                    | NA                                                 | NA                                                      | 40                               | 29 -> 30        | 28 → 26 (6 → 6)                        | 21 → 22 (5 → 5)                                | 6 → 7 (2 → 2)                                  |
| F / 23                | FLE           | No            | LEV 3000, LCM 500          | LEV 3000, LCM 500               | FBTCS                    | 1                                                  | ↓ 100%                                                  | 25                               | 29 -> 27        | 29 → 24 (6 → 6)                        | 23 → 19 (5 → 5)                                | 11 → 11 (3 → 3)                                |
| M / 33                | TLE           | Yes / current | ZNS 300, OXC 1800, PGB 225 | ZNS 200↓, OXC 1800, PGB%        | FAS                      | 70                                                 | ↓ ≥ 75% < 90%                                           | 35                               | 31 -> 37        | 60 → 17 (4 → 7)                        | 12 → 12 (7 → 7)                                | 15 → 13 (4 → 3)                                |
| F / 28                | FLE           | No            | LCM 600, BRV 200, PER 2    | LCM 600, BRV 200, PER 4↑        | FIAS                     | 0.5                                                | ↓ 100%                                                  | 12                               | 31 -> 32        | 23 → 24 (6 → 6)                        | 21 → 22 (5 → 5)                                | 9 → 10 (3 → 3)                                 |
| M / 50                | Other         | No            | ESL 1600, LEV 1500, CLB 30 | ESL 1600, LEV 1500, CLB 30      | FIAS                     | 4                                                  | ↓ ≥ 75% < 90%                                           | 13                               | 30 -> 26        | 44 → 33 (5 → 5)                        | 19 → 19 (5 → 5)                                | 15 → 11 (4 → 3)                                |
| M / 51                | Other         | No            | LEV 1000, ESL 1200, PER 6  | LEV 1000, ESL 1200, PER%        | FAS                      | 10                                                 | ↑ > 100%                                                | 46                               | 29 -> 32        | 51 → 31 (4 → 6)                        | 23 → 21 (5 → 5)                                | 10 → 11 (3 → 3)                                |
| M / 39                | Other         | No            | ZNS 500, LTG 500, CLB 50   | ZNS 500, LTG 400↓, CLB 40↓      | FIAS                     | 0.5                                                | ↑ ≥ 75% < 90%                                           | 40                               | 29 -> 14        | 50 → 63 (4 → 3)                        | 17 → 41 (6 → 1)                                | 10 → 6 (3 → 2)                                 |

Abbreviations: ↓ = decrease/reduction, ↑ = increase, + = add on, % = withdrawn, ASM = antiseizure medication, BRE, brivaracetam, CBZ = Carbamazepine, CLB = clobazam, ESL = eslicarbazepine acetate, LCM = lacosamide, LEV = levetiracetam, LTG = lamotrigine, OXC = oxcarbamazepine; PER = perampanel, PGB = pregabalin; TLE = temporal lobe epilepsy, TPM = topiramate; ZNS = zonisamide. FLE = frontal lobe epilepsy, TLE = temporal lobe epilepsy, NA = not available. The green boxes in the 'ASMs at final observation point' column highlights ASM decrease/reduction, while the red boxes indicate ASM increase. In the 'Change in predominant seizure type compared to baseline' column, green highlights more than 50% seizure reduction, and red indicates more than 50% seizure increase. In the 'EpiTrack change' column and in the subsequent columns, green highlights patients with clinically significant improvement.

**Supplementary Table 3.** Individual changes on ASMs, seizure frequency and test scores during follow-up period in patients with severely impaired performance in EpiTrack at baseline.

| Sex / Age at baseline | Epilepsy type | Psych.com.    | ASMs at baseline                    | ASMs at final observation point    | Predominant seizure type | Monthly seizure frequency 12 months prior baseline | Change in predominant seizure type compared to baseline | Duration of stimulation (months) | EpiTrack change | Change in maze seconds (subtest score) | Change in Interference seconds (subtest score) | Change in Verbal fluency words (subtest score) |
|-----------------------|---------------|---------------|-------------------------------------|------------------------------------|--------------------------|----------------------------------------------------|---------------------------------------------------------|----------------------------------|-----------------|----------------------------------------|------------------------------------------------|------------------------------------------------|
| F / 41                | FLE           | No            | LCM 600                             | LCM 600                            | FIAS                     | 17                                                 | ↓ ≥ 50% < 75%                                           | 31                               | 25 -> 35        | 29 → 9 (6 → 7)                         | 33 → 14 (3 → 6)                                | 12 → 19 (3 → 4)                                |
| F / 28                | FLE           | No            | OXC 1200, ZNS 400                   | OXC 1200, ZNS 250↓                 | FIAS                     | 2                                                  | ↓ ≥ 50% < 75%                                           | 29                               | 18 -> 24        | 26 → 28 (6 → 6)                        | 35 → 22 (2 → 5)                                | 8 → 6 (3 → 2)                                  |
| F / 38                | Other         | YES / current | PER 6, CLB 20                       | PER 4↓, CLB 20                     | FBTCS                    | 4                                                  | No change                                               | 15                               | 14 -> 25        | 64 → 39 (3 → 5)                        | 49 → 37 (1 → 2)                                | 6 → 8 (2 → 3)                                  |
| F / 19                | TLE           | YES / current | OXC 2100, ZNS 400, LEV 1000         | OXC 2100, ZNS 200↓, LEV%           | FIAS                     | 5                                                  | ↑ ≥ 25% < 50%                                           | 29                               | 28 -> 32        | 32 → 16 (6 → 7)                        | 14 → 19 (6 → 5)                                | 3 → 12 (2 → 3)                                 |
| F / 22                | TLE           | No            | LCM 500, BRV 150, ZNS 200           | LCM 500, BRV 200↑, ZNS%            | FIAS                     | 2                                                  | ↓ ≥ 75% < 90%                                           | 18                               | 26 -> 29        | 35 → 21 (5 → 6)                        | 24 → 24 (4 → 4)                                | 7 → 10 (2 → 3)                                 |
| F / 41                | TLE           | No            | LTG 200, ZNS 300, VPA 600           | LTG 200, ZNS 300, VPA 600, CLB 10+ | FIAS                     | 1                                                  | ↓ 100%                                                  | 60                               | 24 -> 26        | 62 → 58 (4 → 4)                        | 21 → 18 (5 → 6)                                | 3 → 9 (2 → 3)                                  |
| M / 46                | FLE           | No            | LTG 200, VPA 1200, TPM 400          | LTG 200, VPA 1200, TPM 400         | FBTCS                    | 1                                                  | ↓ ≥ 50% < 75%                                           | 46                               | 22 -> 29        | 39 → 37 (5 → 5)                        | 24 → 26 (4 → 4)                                | 6 → 8 (2 → 3)                                  |
| M / 24                | FLE           | No            | OXC 1800, PER 12, CLB 90            | OXC 1800, PER 12, CLB 80↓          | FAS                      | 30                                                 | ↓ < 25%                                                 | 31                               | 22 -> 18        | 23 → 57 (6 → 4)                        | 33 → 29 (3 → 3)                                | 8 → 8 (3 → 3)                                  |
| F / 70                | FLE           | No            | LTG 400, PER 10, CLB 30             | LTG 400, PER 8↓, CLB%              | FIAS                     | 10                                                 | ↓ < 25%                                                 | 42                               | 21 -> 30        | 242 → 48 (1 → 4)                       | 25 → 21 (4 → 5)                                | 9 → 11 (3 → 3)                                 |
| M / 32                | TLE           | No            | LTG 400, ZNS 400, CLB 40            | LTG 400, ZNS 400, CLB 20↓          | FIAS                     | 4                                                  | ↓ ≥ 25% < 50%                                           | 35                               | 20 -> 19        | 50 → 70 (4 → 3)                        | 27 → 33 (4 → 3)                                | 9 → 8 (3 → 3)                                  |
| F / 45                | TLE           | Yes / past    | LCM 400, TPM 400, BRV 200           | LCM 400, TPM 100↓, BRV 200         | FIAS                     | 5                                                  | ↓ ≥ 25% < 50%                                           | 24                               | 20 -> 26        | 38 → 40 (5 → 5)                        | 32 → 21 (3 → 5)                                | 2 → 5 (2 → 2)                                  |
| M / 32                | TLE           | Yes / current | LTG 400, ZNS 500, CLB 20            | LTG 400, CLB%, ZNS%                | FIAS                     | Daily                                              | ↓ 100%                                                  | 53                               | 11 -> 19        | 80 → 30 (2 → 6)                        | 40 → 41 (1 → 1)                                | 5 → 7 (2 → 2)                                  |
| F / 33                | FLE           | Yes / past    | ZNS 500, ESL 1600, CLB 30, LEV 1500 | ZNS 500, ESL 1600, LEV%, CLB%      | FBTCS                    | 1                                                  | ↑ 100%                                                  | 32                               | 12 -> 17        | 50 → 33 (4 → 5)                        | 44 → 33 (1 → 3)                                | 5 → 2 (2 → 2)                                  |

Abbreviations: ↓ = decrease/reduction, ↑ = increase, + = add on, % = withdrawn, ASM = antiseizure medication, BRE = brivaracetam, CLB = clobazam, ESL = eslicarbazepine acetate, LCM = lacosamide, LEV = levetiracetam, LTG = lamotrigine, OXC = oxcarbamazepine, PER = perampanel, TPM = topiramate, VPA = valproate, ZNS = zonisamide. FAS = focal aware seizure, FBTCS = focal to bilateral tonic clonic seizure, FIAS = focal impaired awareness seizure, FLE =

frontal lobe epilepsy, TLE = temporal lobe epilepsy. The green boxes in the ' ASMs at final observation point' column highlights ASM decrease/reduction, while the red boxes indicate ASM increase. In the 'Change in predominant seizure type compared to baseline' column, green highlights more than 50% seizure reduction, and red indicates more than 50% seizure increase. In the 'EpiTrack change' column and in the subsequent columns, green highlights patients with clinically significant improvement.

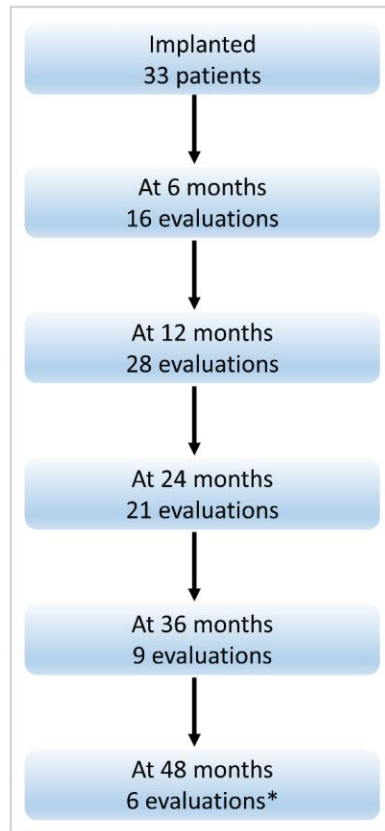

**Supplementary Figure 1.** The flowchart of the follow-up protocol. The figure includes summary of Maze, Interference and Verbal Fluency evaluations at different time points after VNS implantation. Each time point represents a specific duration in months as follows: 6 months (ranging from 4 to 8 months), 12 months (ranging from 18 to 30 months), 24 months (ranging from 30 to 42 months), and 36 months (ranging from 42 to 54 months). \* Two evaluations at 61 and 70 months are included in this time point.

## Psychiatric comorbidities

A.

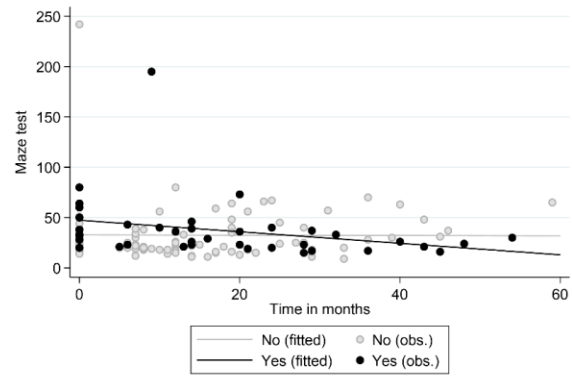

B.

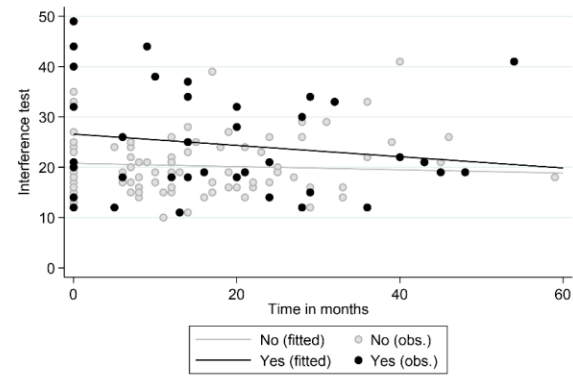

C.

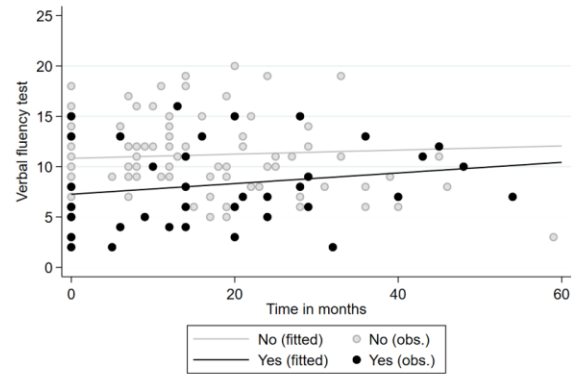

**Supplementary Figure 2.** Observed and fitted curves for **(A)** maze, **(B)** interference and **(C)** verbal fluency test scores based on linear mixed-effects model over time following VNS therapy based on presence of psychiatric comorbidities.

## Epilepsy types

A.

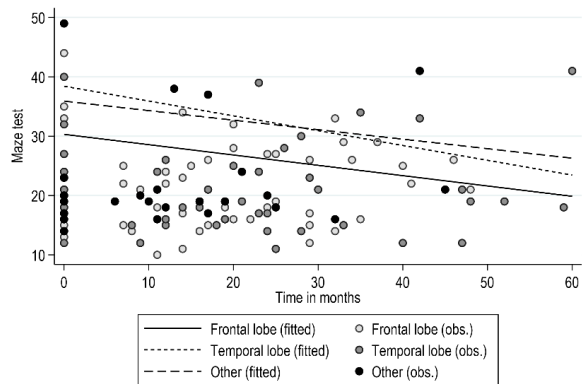

B.

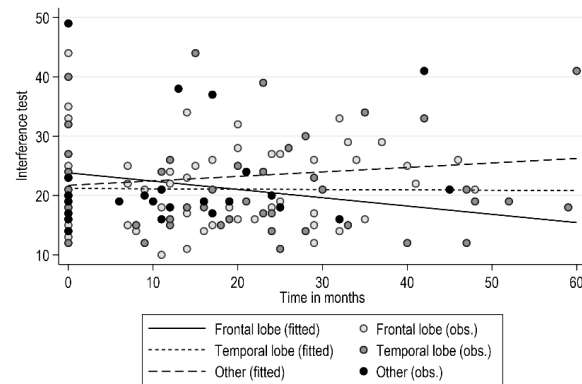

C.

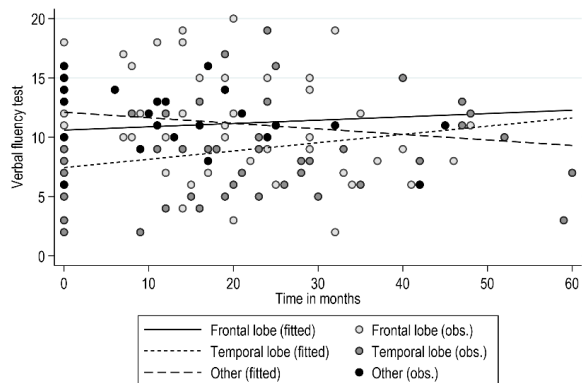

**Supplementary Figure 3.** Observed and fitted curves for **(A)** maze, **(B)** interference and **(C)** verbal fluency test scores based on linear mixed-effects model over time following VNS therapy based on the epilepsy types.

## Predominant seizure types

A.

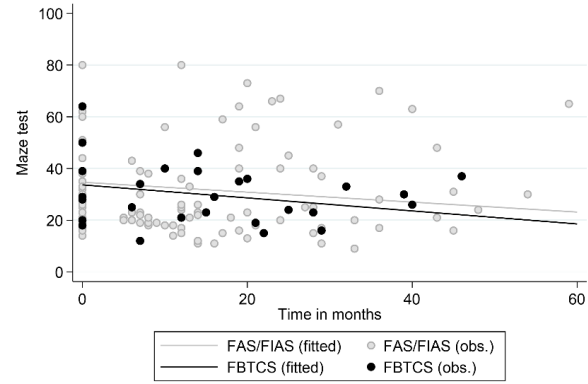

B.

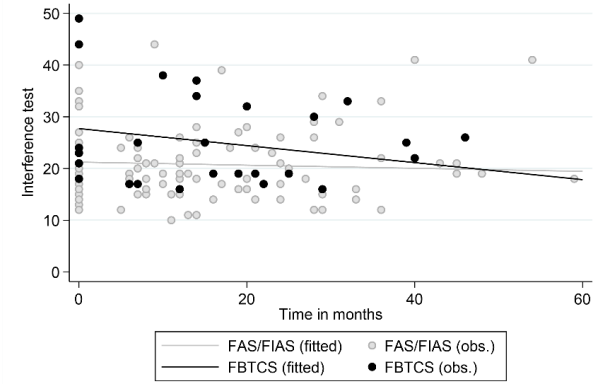

C.

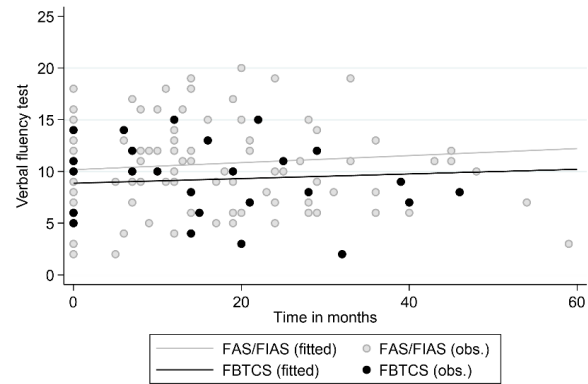

**Supplementary Figure 4.** Observed and fitted curves for **(A)** maze, **(B)** interference and **(C)** verbal fluency test scores based on linear mixed-effects model over time following VNS therapy based on the predominant seizure types.

## Antiseizure medications

A.

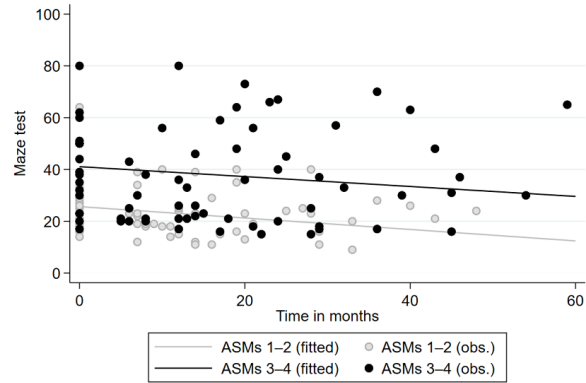

B.

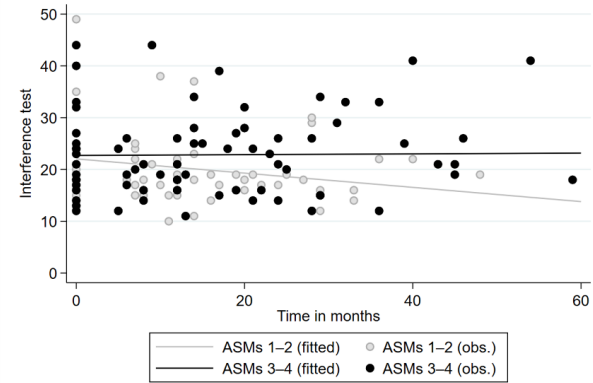

C.

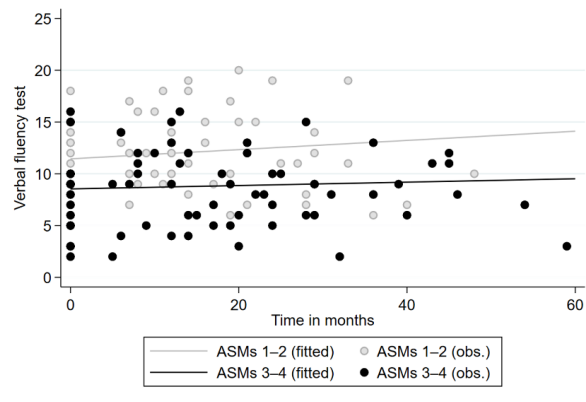

**Supplementary Figure 5.** Observed and fitted curves for **(A)** maze, **(B)** interference and **(C)** verbal fluency test scores based on linear mixed-effects model over time following VNS therapy based on the number of antiseizure medications in use.
